# Supplementary material
Source: PubMed Central journal article supplement (PMC6439831)
Supplement: jamaophthalmol-137-199-s001.pdf [file jamaophthalmol-137-199-s001.pdf]

## Supplementary Online Content

Berlinberg EJ, Gonzales JA, Doan T, Acharya NR. Association between noninfectious uveitis and psychological stress. *JAMA Ophthalmol*. Published online December 6, 2018. doi:10.1001/jamaophthalmol.2018.5893

**eTable.** Demographic and Clinical Characteristics of Uveitis Group

This supplementary material has been provided by the authors to give readers additional information about their work.

**eTable. Demographic and Clinical Characteristics of Uveitis Group**

| Variable                                         | Recently Active Uveitis<br>N (%)         | Controlled Uveitis<br>N (%)              | P-value           |
|--------------------------------------------------|------------------------------------------|------------------------------------------|-------------------|
| Female                                           | 24 (60%)                                 | 26 (65%)                                 | .82 <sup>a</sup>  |
| Mean Age (SD)                                    | 43.4 (18.6)                              | 45.4 (16.1)                              | .60 <sup>b</sup>  |
| Race/Ethnicity                                   |                                          |                                          | .68 <sup>a</sup>  |
| <i>White</i>                                     | 21 (52 %)                                | 23 (58%)                                 |                   |
| <i>Black</i>                                     | 4 (10%)                                  | 3 (8%)                                   |                   |
| <i>Asian</i>                                     | 7 (18%)                                  | 10 (25%)                                 |                   |
| <i>Hispanic</i>                                  | 3 (8%)                                   | 3 (8%)                                   |                   |
| <i>Other</i>                                     | 1 (2%)                                   | 0 (0%)                                   |                   |
| <i>Multiracial</i>                               | 4 (10%)                                  | 1 (2%)                                   |                   |
| Current smoker                                   | 2 (5%)                                   | 2 (5%)                                   | .85 <sup>a</sup>  |
| Median Household Income in Dollars (IQR)         | 86,661.50<br>(56,646.50 –<br>129,108.00) | 78,301.00<br>(68,869.00 –<br>119,281.00) | .90 <sup>c</sup>  |
| Marital Status                                   |                                          |                                          | .29 <sup>a</sup>  |
| <i>Single</i>                                    | 18 (45%)                                 | 13 (32%)                                 |                   |
| <i>Married</i>                                   | 21 (52%)                                 | 22 (55%)                                 |                   |
| <i>Divorced</i>                                  | 0 (0%)                                   | 3 (8%)                                   |                   |
| <i>Widowed</i>                                   | 1 (2%)                                   | 1 (2%)                                   |                   |
| <i>Separated</i>                                 | 0 (0%)                                   | 1 (2%)                                   |                   |
| Living Situation                                 |                                          |                                          | .78 <sup>a</sup>  |
| <i>Alone</i>                                     | 4 (10%)                                  | 7 (18%)                                  |                   |
| <i>With Family</i>                               | 29 (72%)                                 | 26 (65%)                                 |                   |
| <i>With Friends</i>                              | 2 (5%)                                   | 3 (8%)                                   |                   |
| <i>With Roommates</i>                            | 5 (12%)                                  | 4 (10%)                                  |                   |
| Education                                        |                                          |                                          | .27 <sup>a</sup>  |
| <i>Less than High School</i>                     | 1 (2%)                                   | 0 (0%)                                   |                   |
| <i>High School</i>                               | 3 (8%)                                   | 3 (8%)                                   |                   |
| <i>Some College</i>                              | 13 (32%)                                 | 6 (15%)                                  |                   |
| <i>Bachelor's Degree</i>                         | 12 (30%)                                 | 15 (38%)                                 |                   |
| <i>Professional or Graduate Degree</i>           | 11 (28%)                                 | 16 (15%)                                 |                   |
| Mean Drinks per Week (SD)                        | 2 (3)                                    | 2 (3)                                    | .89 <sup>b</sup>  |
| Have Dependents                                  | 11 (28%)                                 | 12 (30%)                                 | >.99 <sup>a</sup> |
| Comorbid Conditions                              |                                          |                                          |                   |
| <i>Heart disease</i>                             | 3 (8%)                                   | 1 (2%)                                   | .62 <sup>a</sup>  |
| <i>Cancer</i>                                    | 5 (12%)                                  | 4 (10%)                                  | >.99 <sup>a</sup> |
| <i>Depression</i>                                | 12 (30%)                                 | 4 (10%)                                  | .05 <sup>a</sup>  |
| <i>Anxiety</i>                                   | 9 (22%)                                  | 6 (15%)                                  | .57 <sup>a</sup>  |
| <i>Hypertension</i>                              | 7 (18%)                                  | 3 (8%)                                   | .31 <sup>a</sup>  |
| <i>Diabetes</i>                                  | 3 (8%)                                   | 3 (8%)                                   | >.99 <sup>a</sup> |
| <i>Systemic Autoimmune (Other than Diabetes)</i> | 16 (40%)                                 | 20 (50%)                                 | .50 <sup>a</sup>  |

| Variable                                                                             | Recently Active Uveitis N (%) | Controlled Uveitis N (%) | P-value            |
|--------------------------------------------------------------------------------------|-------------------------------|--------------------------|--------------------|
| Median Number of All Other Comorbid Conditions (Excluding Systemic Autoimmune) (IQR) | 0 (0 - 1)                     | 0.5 (0 - 2)              | .08 <sup>c</sup>   |
| Work Status                                                                          |                               |                          | .66 <sup>a</sup>   |
| Unemployed                                                                           | 4 (10%)                       | 2 (5%)                   |                    |
| Full Time                                                                            | 21 (52%)                      | 24 (60%)                 |                    |
| Part Time                                                                            | 5 (12%)                       | 4 (10%)                  |                    |
| Retired                                                                              | 7 (18%)                       | 7 (18%)                  |                    |
| Homemaker                                                                            | 0 (0%)                        | 2 (5%)                   |                    |
| Other                                                                                | 3 (8%)                        | 1 (2%)                   |                    |
| VAS Pain (0-10) mean (SD)                                                            | 20.1 (26.1)                   | 12.4 (20.2)              | .14 <sup>b</sup>   |
| Median converted logMAR Vision in the better seeing eye (IQR)                        | 0.14 (0 - 0.39)               | 0 (0 - 0.1)              | .003 <sup>c</sup>  |
| Anatomical Location                                                                  |                               |                          | .16 <sup>a</sup>   |
| Anterior                                                                             | 23 (58%)                      | 18 (45%)                 |                    |
| Intermediate                                                                         | 2 (2%)                        | 5 (12%)                  |                    |
| Anterior + Intermediate                                                              | 3 (8%)                        | 7 (18%)                  |                    |
| Posterior                                                                            | 6 (15%)                       | 2 (5%)                   |                    |
| Panuveitis                                                                           | 7 (18%)                       | 8 (20%)                  |                    |
| Bilateral Disease                                                                    | 35 (88%)                      | 28 (70%)                 | .10 <sup>a</sup>   |
| Uveitis Diagnosis                                                                    |                               |                          | .09 <sup>a</sup>   |
| Undifferentiated                                                                     | 20 (50%)                      | 11 (28%)                 |                    |
| Retinal vasculitis                                                                   | 2 (5%)                        | 2 (5%)                   |                    |
| Serpiginous choroiditis                                                              | 0 (0%)                        | 1 (2%)                   |                    |
| Multifocal choroiditis with panuveitis                                               | 2 (5%)                        | 2 (5%)                   |                    |
| Birdshot retinochoroidopathy                                                         | 0 (0%)                        | 2 (5%)                   |                    |
| Pars planitis                                                                        | 3 (8%)                        | 1 (2%)                   |                    |
| Behçet's disease                                                                     | 0 (0%)                        | 2 (5%)                   |                    |
| Sarcoidosis                                                                          | 3 (8%)                        | 4 (10%)                  |                    |
| Multiple sclerosis                                                                   | 0 (0%)                        | 2 (5%)                   |                    |
| Juvenile idiopathic arthritis                                                        | 1 (2%)                        | 1 (2%)                   |                    |
| Seronegative spondyloarthropathy                                                     | 2 (5%)                        | 8 (20%)                  |                    |
| Inflammatory bowel disease                                                           | 0 (0%)                        | 1 (2%)                   |                    |
| HLA-B27 positive, no reported joint involvement                                      | 0 (0%)                        | 3 (8%)                   |                    |
| Vogt-Koyanagi-Harada disease                                                         | 0 (0%)                        | 1 (2%)                   |                    |
| Other                                                                                | 4 (10%)                       | 2 (5%)                   |                    |
| Median years duration of disease (IQR)                                               | 5.5 (1 - 12)                  | 6 (2 - 14)               | .30 <sup>c</sup>   |
| Diagnosed Systemic Disease                                                           | 16 (40%)                      | 23 (58%)                 | .18 <sup>a</sup>   |
| Any corticosteroid use                                                               | 33 (82%)                      | 17 (42%)                 | <.001 <sup>a</sup> |
| Current Immunomodulatory Therapy                                                     | 18 (45%)                      | 20 (50%)                 | .82 <sup>a</sup>   |
| Number of eye medications (IQR)                                                      | 1.5 (1 - 3.5)                 | 1 (0 - 3)                | .17 <sup>c</sup>   |
| Number of previous injections (IQR)                                                  | 0 (0 - 1.5)                   | 0 (0 - 0)                | .01 <sup>c</sup>   |

- a. Fisher's exact test
- b. Student's t-test
- c. Mann-Whitney U test
